# Supplementary material for: Effect of Antidepressant Medication Use on Emotional Information Processing in Major Depression
Source: Atypon-hosted journal article supplement (doi:10.1176/appi.ajp.2013.12091243), 2013-09-13

**TABLE S1. Self-reported medication information for MDD-medicated participants**

| MDD-medicated participant | Primary antidepressant medication | Primary medication dose | Time on primary medication (weeks) | Other reported medication              |
|---------------------------|-----------------------------------|-------------------------|------------------------------------|----------------------------------------|
| 1                         | venlafaxine                       | 75 mg                   | 227                                | lamotrigine 150 mg                     |
| 2                         | venlafaxine                       | 75 mg                   | 16                                 | trazodone 200mg                        |
| 3                         | duloxetine                        | 60 mg                   | 328                                | --                                     |
| 4                         | citalopram                        | 40 mg                   | 143                                | --                                     |
| 5                         | venlafaxine                       | 150 mg                  | 205                                | lamotrigine 200 mg<br>bupropion 300 mg |
| 6                         | --                                | --                      | --                                 | --                                     |
| 7                         | bupropion                         | --                      | 308                                | --                                     |
| 8                         | bupropion                         | 300 mg                  | 119                                | lithium 300 mg                         |
| 9                         | citalopram                        | --                      | 76                                 | --                                     |
| 10                        | --                                | --                      | --                                 | --                                     |
| 11                        | escitalopram                      | 10 mg                   | 27                                 | bupropion 150 mg                       |
| 12                        | sertraline                        | --                      | 1.5                                | --                                     |
| 13                        | bupropion                         | 300 mg                  | 10                                 | --                                     |
| 14                        | escitalopram                      | 10 mg                   | --                                 | --                                     |
| 15                        | citalopram                        | 20 mg                   | 126                                | --                                     |
| 16                        | duloxetine                        | --                      | 7                                  | --                                     |
| 17                        | venlafaxine                       | 300 mg                  | 106                                | --                                     |
| 18                        | escitalopram                      | 10 mg                   | 81                                 | --                                     |
| 19                        | citalopram                        | 20 mg                   | 24                                 | --                                     |
| 20                        | duloxetine                        | 60 mg                   | 13                                 | --                                     |
| 21                        | paroxetine                        | 20 mg                   | 520                                | --                                     |

**FIGURE S1.** An example of a single study trial with dysphoric (upper left), neutral (upper right), positive (lower right), and threat (lower left) stimuli. To avoid copyright infringement, IAPS images used in the study have been replaced with similar public domain images in this figure.

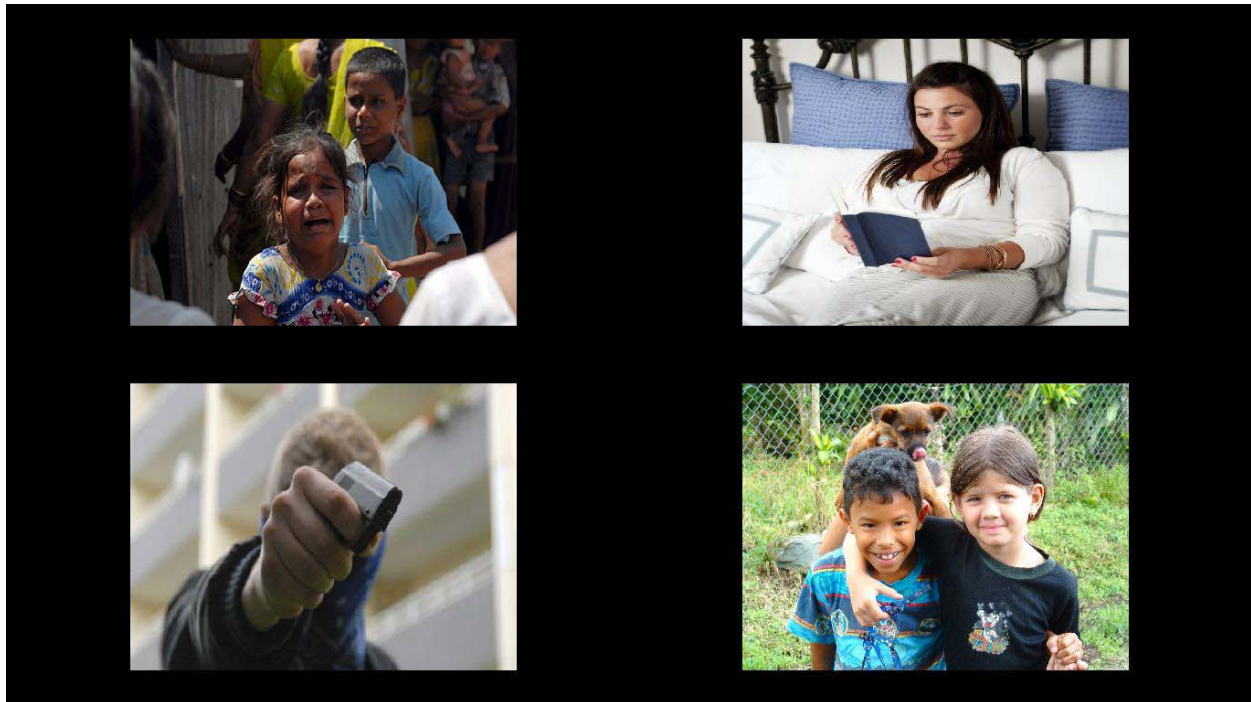

**FIGURE S2.** Mean total gaze duration for positive stimuli, by 5-second epoch and group

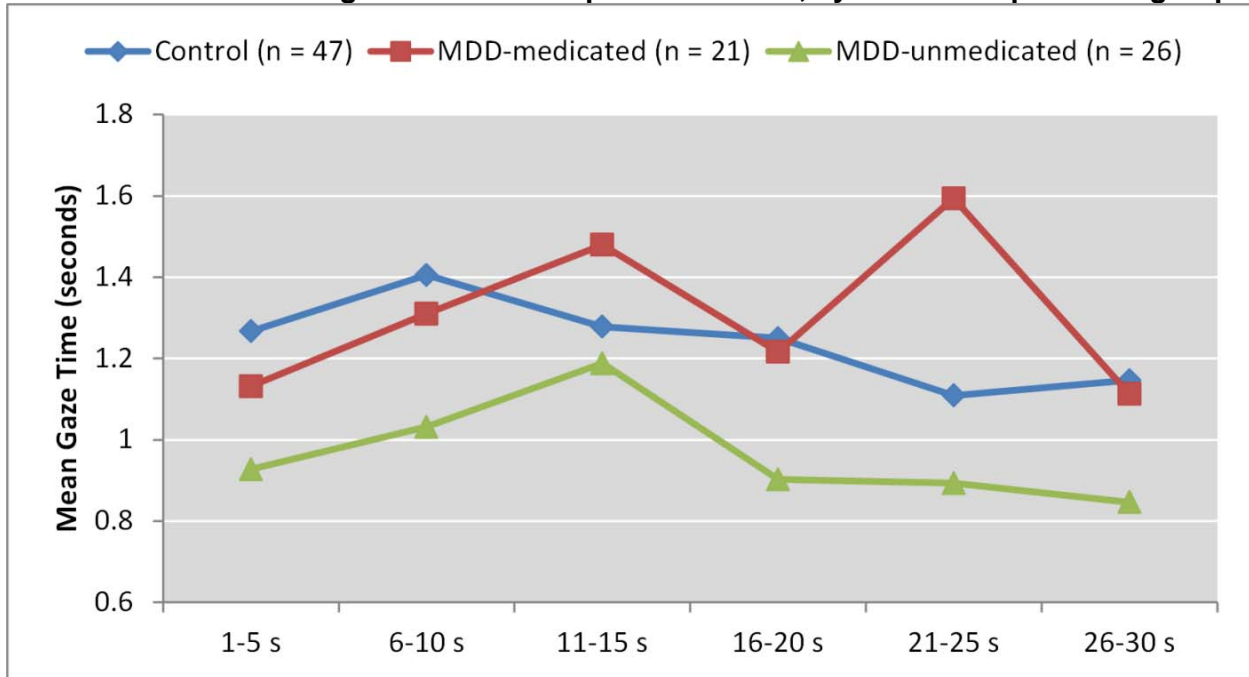

Supplement: 195_ds001.pdf [file 195_ds001.pdf]
